# Supplementary material for: One-step co-precipitation synthesis of novel BiOCl/CeO2composites with enhanced photodegradation of rhodamine B
Source: Royal Society of Chemistry journal article supplement (doi:10.1039/c9qi01524h), 2020-01-01
Supplement: c9qi01524h1.pdf [file c9qi01524h1.pdf]

## Supporting information for

### One-step co-precipitation synthesis of novel BiOCl/CeO<sub>2</sub> composites with enhanced photodegradation of rhodamine B

Yu Zhang,<sup>a</sup> Qian Shao,<sup>\*a</sup> Heyun Jiang,<sup>a</sup> Lirong Liu,<sup>a</sup> Mingyang Wu,<sup>a</sup> Jing Lin,<sup>b,\*</sup>

Jiaoxia Zhang,<sup>c,f</sup> Shide Wu,<sup>d</sup> Mengyao Dong,<sup>e,f</sup> and Zhanhu Guo<sup>\*f</sup>

<sup>a</sup> College of Chemical and Environmental Engineering, Shandong University of Science and  
Technology, Qingdao 266590, China

<sup>b</sup> School of Chemistry and Chemical Engineering, Guangzhou University, Guangzhou, 510006  
China

<sup>c</sup> School of Materials Science and Engineering, Jiangsu University of Science and Technology,  
Zhenjiang 212003, China

<sup>d</sup> Henan Provincial Key Laboratory of Surface and Interface Science, Zhengzhou University of  
Light Industry, No. 136, Science Avenue, Zhengzhou, 450001, China

<sup>e</sup> Key Laboratory of Materials Processing and Mold (Zhengzhou University), Ministry of  
Education, National Engineering Research Center for Advanced Polymer Processing Technology,  
Zhengzhou University, Zhengzhou, China

<sup>f</sup> Integrated Composites Laboratory (ICL), Department of Chemical & Biomolecular Engineering,  
University of Tennessee, Knoxville, TN 37996, USA

\* Corresponding author:

shaoqian@sdust.edu.cn (Q. Shao); linjing@gzhu.edu.cn (J. Lin); zguo10@utk.edu (Z. Guo)

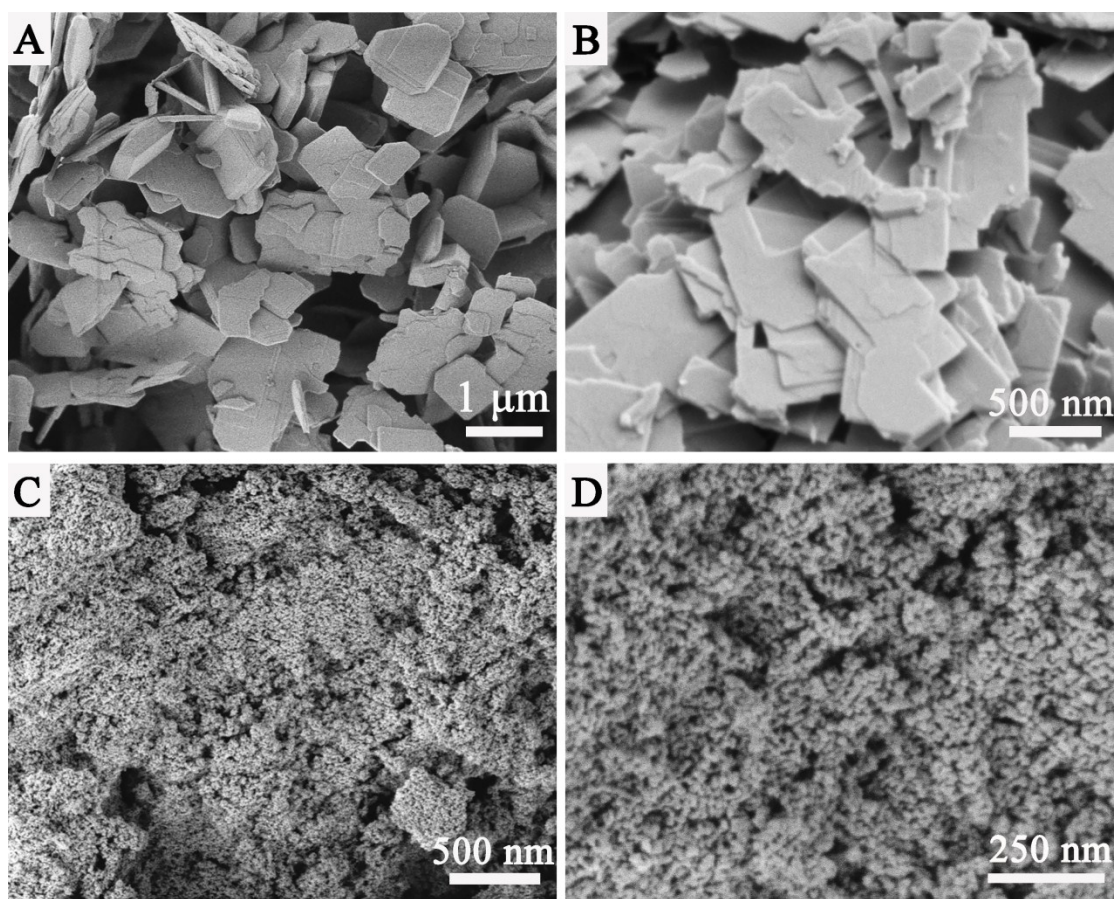

**Fig. S1** SEM images of BiOCl (A, B) and CeO<sub>2</sub> (C, D).

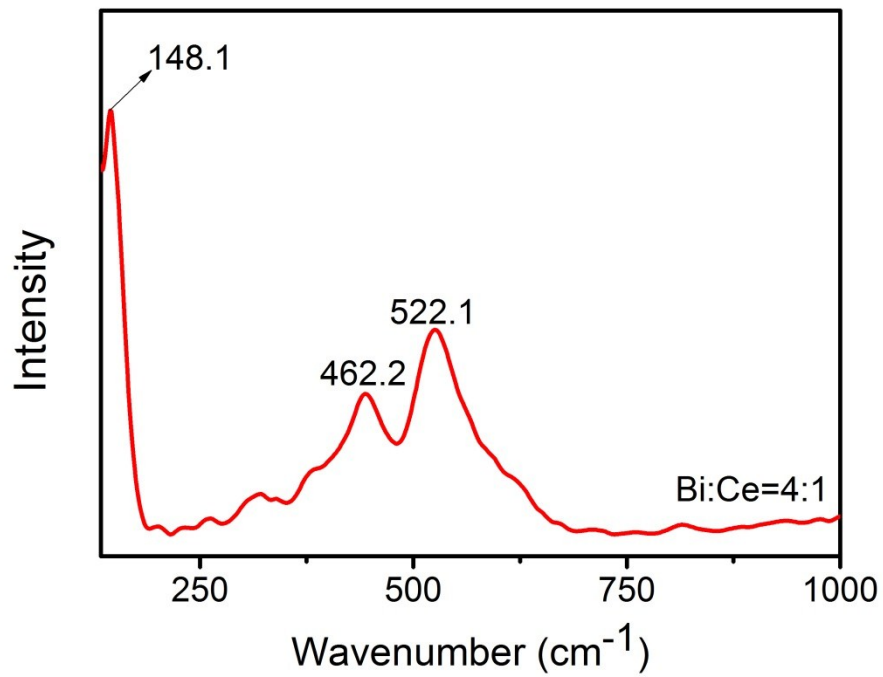

**Fig. S2** Raman spectrum of Bi:Ce=4:1 composites.

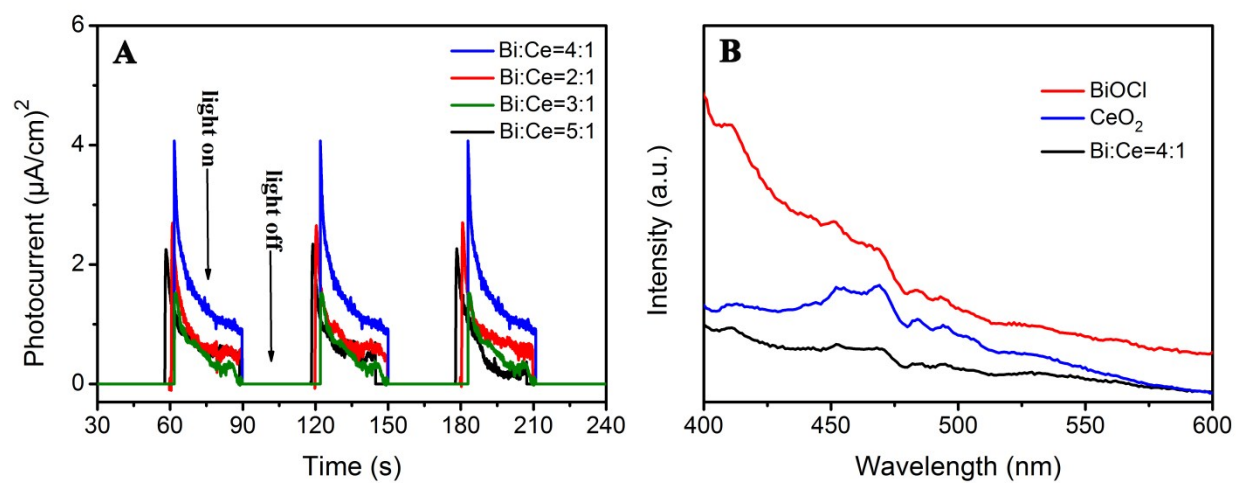

**Fig. S3** The transient photocurrent responses (A) of Bi:Ce=2:1, Bi:Ce=3:1, Bi:Ce=4:1 and Bi:Ce=5:1 and PL spectra (B) of BiOCl,  $\text{CeO}_2$  and Bi:Ce=4:1.

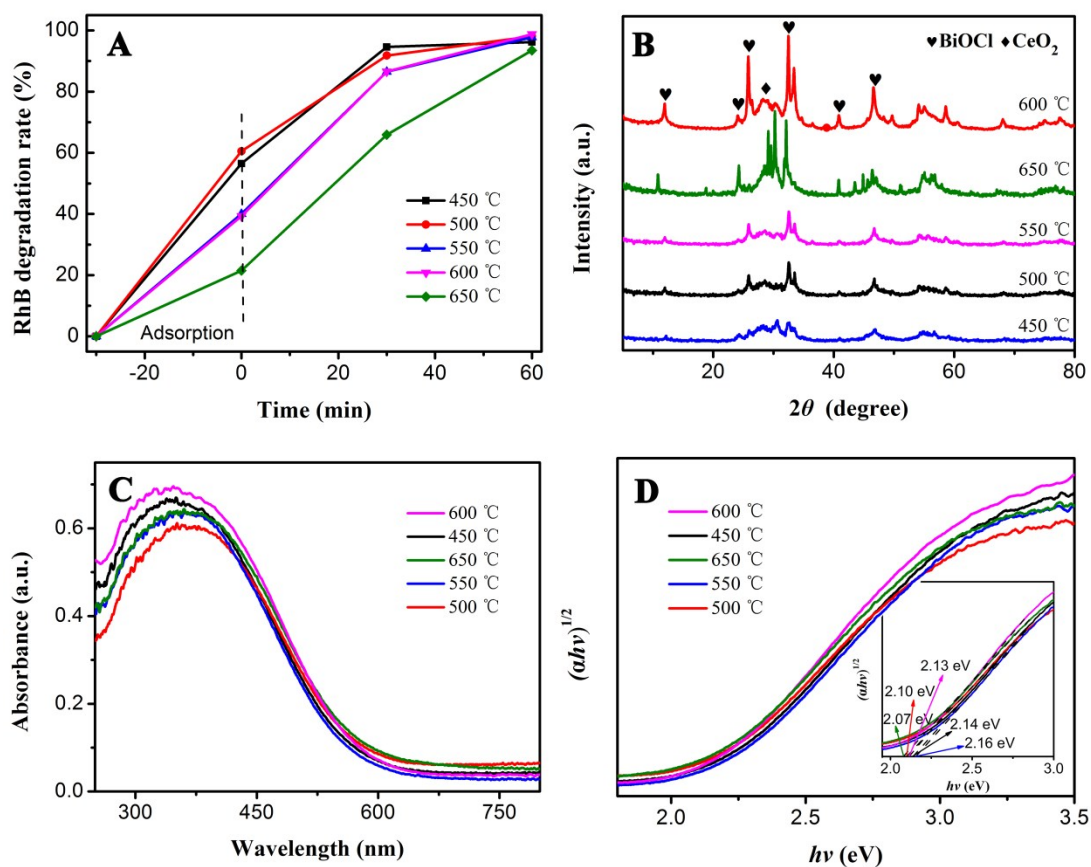

**Fig. S4** RhB degradation efficiency (A), XRD patterns (B), UV-vis absorption spectra (C) and the plotting of  $(\alpha h\nu)^{1/2}$  vs.  $h\nu$  (D) of Bi/Ce = 4:1 synthesized at different calcination temperatures.

The X-ray diffraction patterns of all the above-prepared samples showed the changes in the phase structure from Bi/Ce=4:1 composites under different calcination temperature (Fig. S4B). When the annealing temperature is 450 °C, 500 °C and 550 °C, the intensity of Bi:Ce=4:1 is lower than 600 °C and 650 °C and the main diffraction peaks is not obvious, indicating the temperature can impact the crystalline structure and the structure of the complexes. As shown in Fig. S4B, the diffraction of 600 °C fits well with the diffraction peaks of BiOCl. Compared with the diffraction peaks of 600 °C, some diffraction peaks of BiOCl in the 650 °C disappear and shifted, which further illustrates high temperature would destroy the crystalline structure. These

results indicate that inappropriate temperature breaks down the structure of the complexes and the calcination at 600 °C is the best calcination condition.

Fig. S4C shows the UV-vis absorption spectra of Bi/Ce = 4:1 synthesized at different calcination temperatures. All as-obtained samples have similar absorption wavelength and band gap, which show a strong absorbance at wavelengths less than 410 nm. It can be seen from Fig. S4C, the composites with Bi/Ce=4:1 obtained at calcination temperature of 600 °C exhibit a strong absorbance. As shown in Fig. S4D, The band gap energy values of Bi/Ce=4:1 composites obtained at calcination temperature of 600 °C, 450 °C, 650 °C, 550 °C and 500 °C are 2.13 eV, 2.14 eV, 2.07 eV, 2.16 eV and 2.10 eV, respectively.
